# Supplementary material for: The mass-action law based algorithms for quantitative econo-green bio-research
Source: Royal Society of Chemistry journal article supplement (doi:10.1039/c0ib00130a), 2011-03-14

## **Supplementary Information**

Scheme S-1. Derivation of the median-effect equation as the general theory for the related theorems. (a) Diagram of merging the mass-action law with mathematical induction-deduction to derive general equations to create individual methods, general methods, and computer software. (b) Flow chart showing the derivation of the multiple drug-effect equation from the single drug-effect equation, and the derivation of the higher order equation from the first order equation using the median-effect principle as the common link.  $f_i$ , fractional inhibition;  $f_v$ , fractional velocity that is not inhibited; X, mutually exclusive among inhibitors and NX, mutually non-exclusive among inhibitors. (Figure updated from ref. 7. Copyright 1991 with permission from Elsevier).

Figure S-1. Slow onset of recognition of the MEE<sup>2</sup> and its CI theory<sup>21</sup> during the past three and half decades by the biomedical communities as shown by (a) Time course of cumulative citations of ref. 21 during 1984 to August 31, 2010. (b) Citation map of total citations of ref. 21 by different journals as of August 31, 2010. (Based on Thompson ISI Web of Knowledge/ResearcherID).

**a.** Time Course of Cumulative Citations of Ref. 21, 1984 to August 2010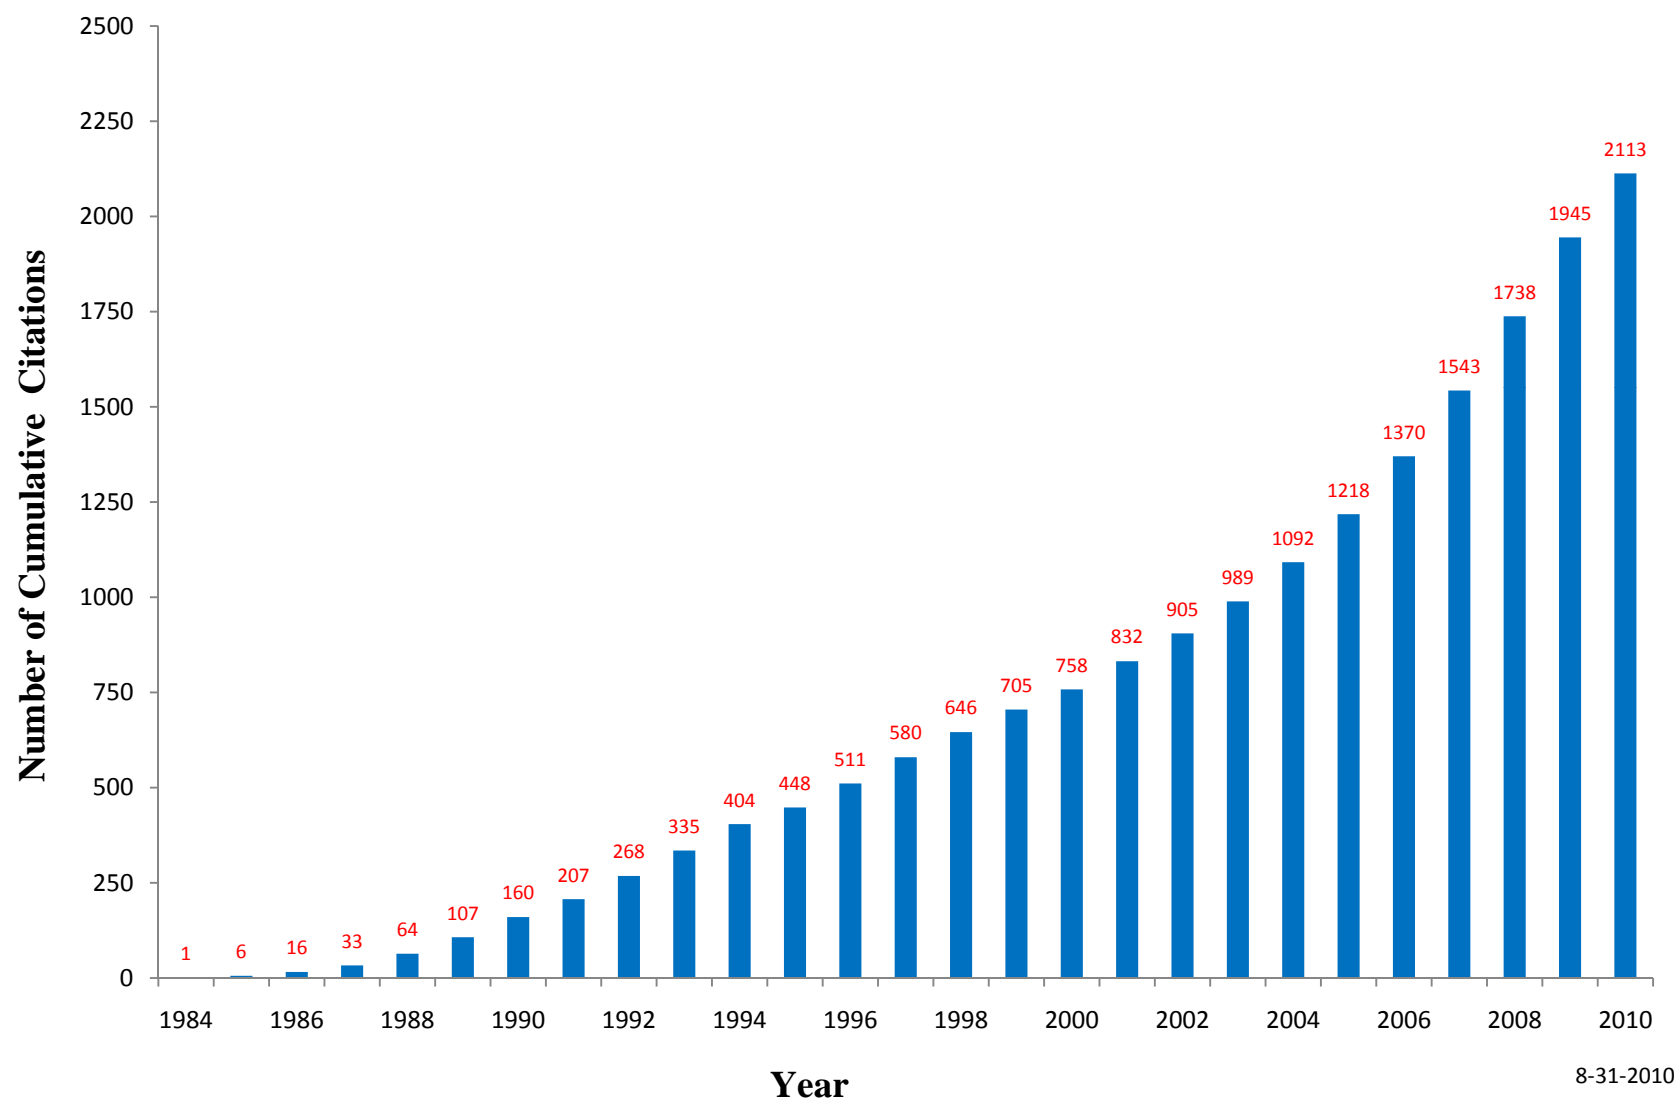

# Quantitative-Analysis of Dose-Effect Relationships- The Combined Effects of Multiple-Drugs or Enzyme-Inhibitors

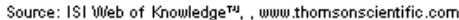

**CHOU, TC; TALALAY, P**  
**ADVANCES IN ENZYME REGULATION, 22: 27-55, 1984**

**Times Cited: 2,137 (In 453 Journals)**

Chou, Figure S-1b

a

The Derivation of  
the Median-Effect Principle  
and Its Extensions to  
Multiple Drug Effect Equation

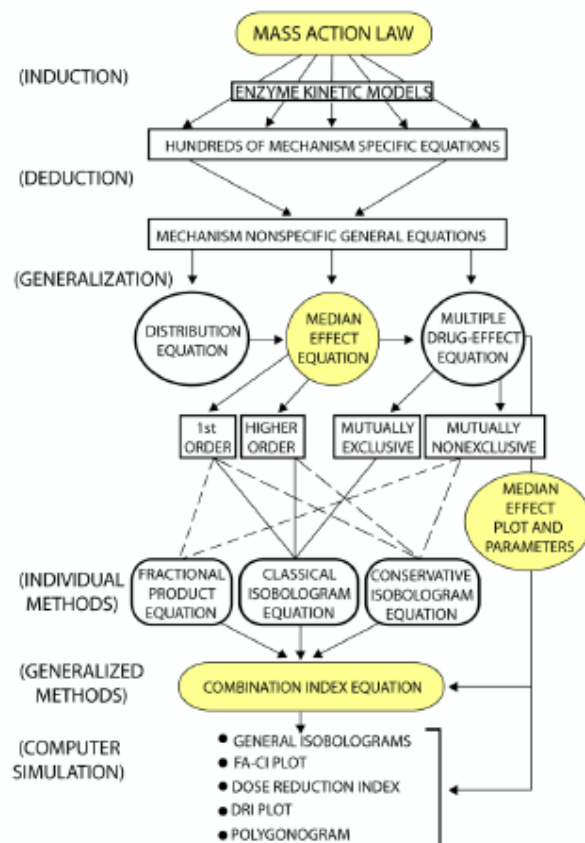

b

The Derivation of  
Multiple Drug-Effect Equations  
with a Flow-Chart

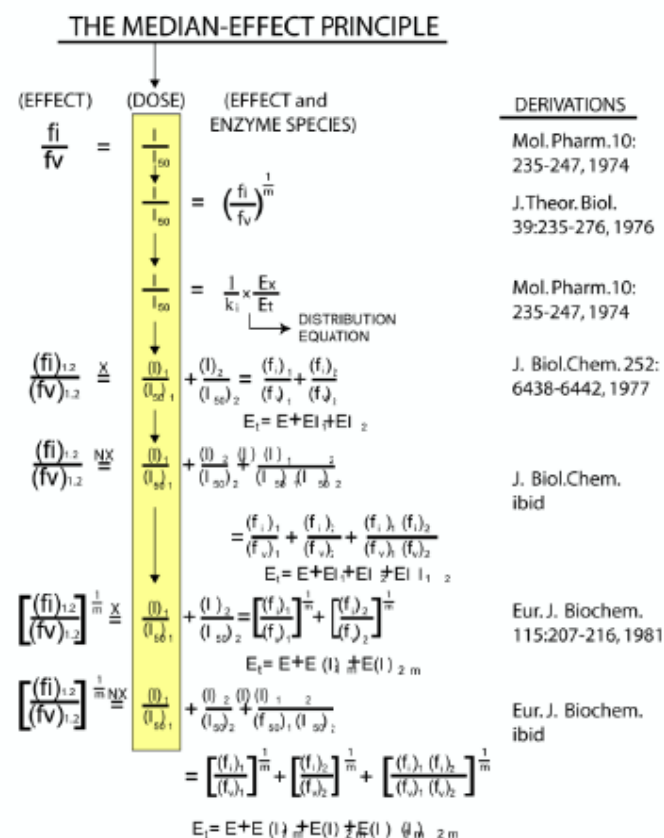

Supplement: c0ib00130a.pdf [file c0ib00130a.pdf]
